# Supplementary material
Source: Springer Nature journal article supplement (https://www.springermedizin.de/resource/supplementary/13034_2011_187_MOESM1_ESM.pdf/9652486)

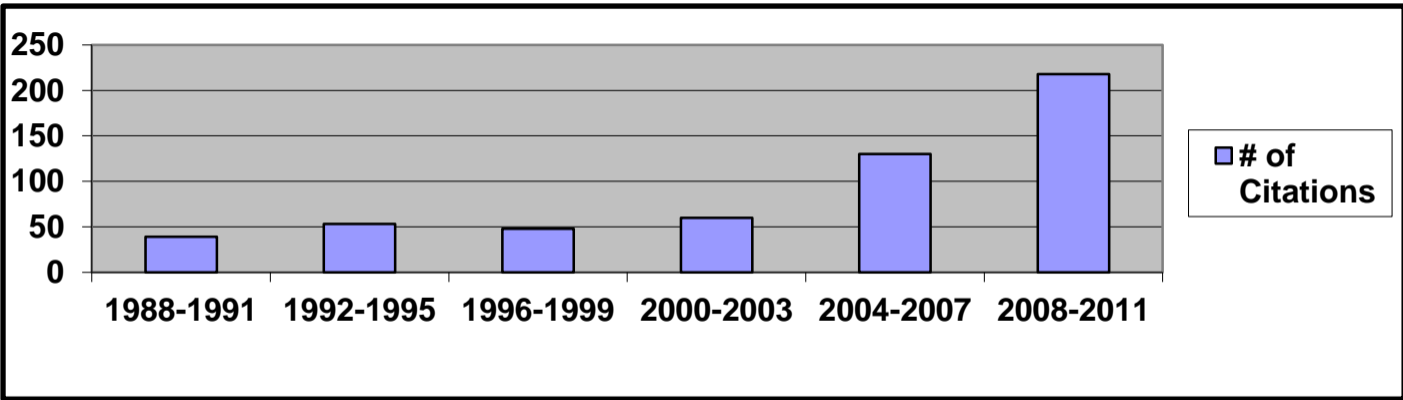

Supplement: MOESM1 [file 9652486]
